# Supplementary material for: Socio-demographic and lifestyle factors associated with intrinsic capacity among older adults: evidence from India
Source: Springer Nature journal article supplement (doi:10.1186/s12877-022-03558-7), 2022-11-12
Supplement: MOESM1 [file 23705514]

## Supplemental material

**Table S1:** Differences in socio-demographic characteristics of included and excluded sample in the study

| Variables          | Included<br>(n=24,136) | Excluded due to<br>incomplete data<br>(n=7,328) | Difference | Chi2 p-<br>value |
|--------------------|------------------------|-------------------------------------------------|------------|------------------|
| Age                |                        |                                                 |            | <0.001           |
|                    | 62.3                   | 48.66                                           | 13.64      |                  |
|                    | 28.92                  | 32.06                                           | -3.14      |                  |
|                    | 8.79                   | 19.28                                           | -10.49     |                  |
| Sex                |                        |                                                 |            | <0.001           |
|                    | 48.51                  | 44.04                                           | 4.47       |                  |
|                    | 51.49                  | 55.96                                           | -4.47      |                  |
| Marital status     |                        |                                                 |            | <0.001           |
|                    | 63.75                  | 55.62                                           | 8.13       |                  |
|                    | 34.18                  | 41.31                                           | -7.13      |                  |
|                    | 2.07                   | 3.07                                            | -1         |                  |
| Living arrangement |                        |                                                 |            | <0.001           |
|                    | 5.75                   | 5.17                                            | 0.58       |                  |
|                    | 20.06                  | 19.15                                           | 0.91       |                  |
|                    | 43.11                  | 35.59                                           | 7.52       |                  |
|                    | 31.07                  | 40.09                                           | -9.02      |                  |
| Education          |                        |                                                 |            | <0.001           |
|                    | 72.63                  | 77.47                                           | -4.84      |                  |
|                    | 19.21                  | 15.17                                           | 4.04       |                  |
|                    | 8.16                   | 7.36                                            | 0.8        |                  |
| Work status        |                        |                                                 |            | <0.001           |
|                    | 25.92                  | 30.14                                           | -4.22      |                  |
|                    | 33.92                  | 40.57                                           | -6.65      |                  |
|                    | 32.66                  | 21.47                                           | 11.19      |                  |
|                    | 7.5                    | 7.82                                            | -0.32      |                  |
| MPCE quintile      |                        |                                                 |            | <0.001           |
|                    | 20.02                  | 22.53                                           | -2.51      |                  |
|                    | 20.39                  | 21.23                                           | -0.84      |                  |
|                    | 20.7                   | 19.36                                           | 1.34       |                  |
|                    | 20.13                  | 17.9                                            | 2.23       |                  |
|                    | 18.76                  | 18.97                                           | -0.21      |                  |
| Caste status       |                        |                                                 |            | <0.001           |
|                    | 26.4                   | 34.83                                           | -8.43      |                  |

|                    |       |       |       |        |
|--------------------|-------|-------|-------|--------|
|                    | 46.14 | 35.21 | 10.93 |        |
|                    | 27.45 | 29.97 | -2.52 |        |
| Religion           |       |       |       | 0.097  |
|                    | 83.13 | 72.34 | 10.79 |        |
|                    | 10.73 | 12    | -1.27 |        |
|                    | 6.14  | 15.67 | -9.53 |        |
| Place of residence |       |       |       | 0.123  |
|                    | 28.61 | 34.88 | -6.27 |        |
|                    | 71.39 | 65.12 | 6.27  |        |
| Regions            |       |       |       | <0.001 |
|                    | 12.72 | 17.96 | -5.24 |        |
|                    | 21.75 | 12.19 | 9.56  |        |
|                    | 24.55 | 15.94 | 8.61  |        |
|                    | 2.95  | 11.61 | -8.66 |        |
|                    | 22.14 | 24.84 | -2.7  |        |
|                    | 15.89 | 17.47 | -1.58 |        |

---

*MPCE: Monthly per capita consumption expenditure*

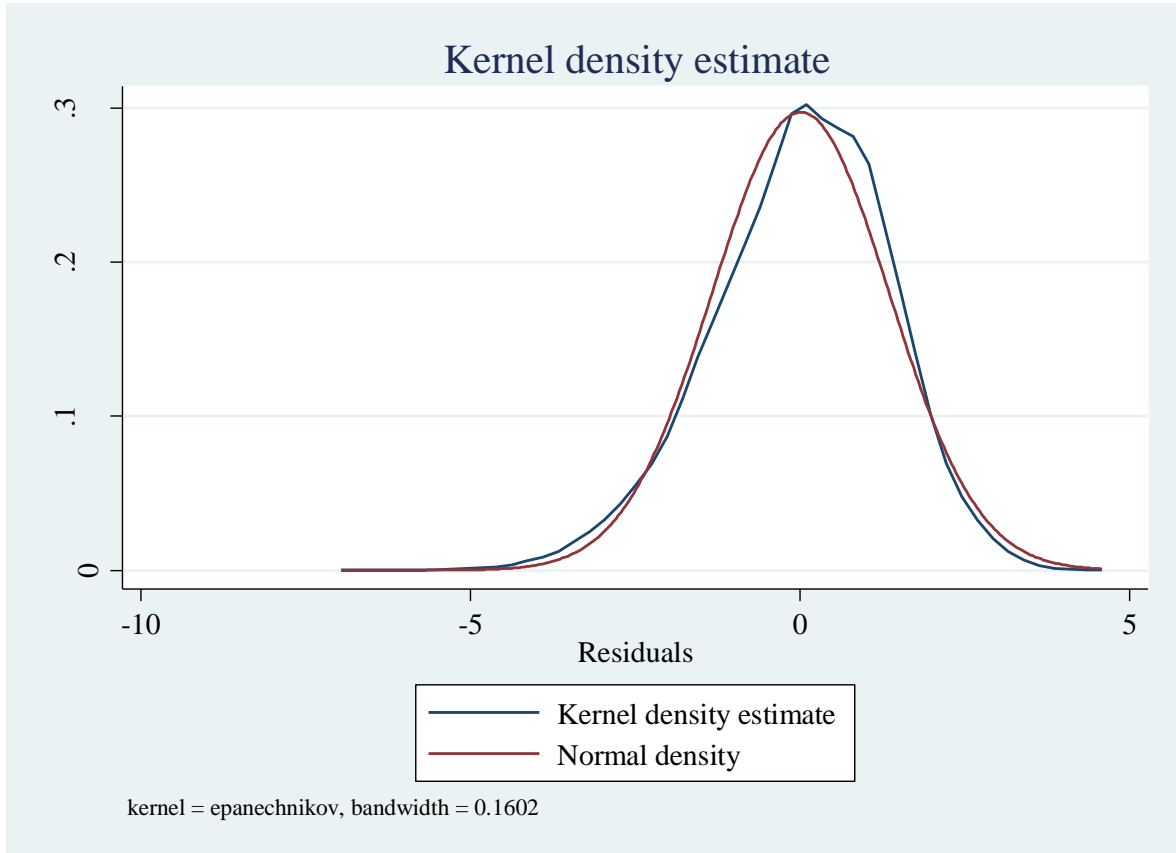

**Figure S1:** Kernel density plot showing the normality of residuals

**Table S2:** VIF estimates for the selected explanatory variables

| <b>Variables</b>                  | <b>Sub-categories</b> | <b>VIF</b> | <b>1/VIF</b> |
|-----------------------------------|-----------------------|------------|--------------|
| <b>Age</b>                        | 60-69                 |            |              |
|                                   | 70-79                 | 1.13       | 0.882813     |
|                                   | 80+                   | 1.16       | 0.860372     |
| <b>Sex</b>                        | Male                  |            |              |
|                                   | Female                | 2.08       | 0.480371     |
| <b>Marital status</b>             | Currently in union    |            |              |
|                                   | Widowed               | 1.3        | 0.769613     |
|                                   | Others                | 1.02       | 0.976605     |
| <b>Educational status</b>         | No                    |            |              |
|                                   | Primary               | 1.22       | 0.816984     |
|                                   | Secondary             | 1.47       | 0.681755     |
|                                   | Higher                | 1.62       | 0.616247     |
| <b>Work status</b>                | Never worked          |            |              |
|                                   | Not working           | 1.97       | 0.508335     |
|                                   | Working               | 2.48       | 0.402723     |
|                                   | Retired               | 1.62       | 0.616117     |
| <b>Smoke tobacco</b>              | No                    |            |              |
|                                   | Yes                   | 1.34       | 0.745309     |
| <b>Chew tobacco</b>               | No                    |            |              |
|                                   | Yes                   | 1.3        | 0.766597     |
| <b>Episodic alcohol</b>           | No                    |            |              |
|                                   | Yes                   | 1.1        | 0.909277     |
| <b>Moderate physical activity</b> | No                    |            |              |
|                                   | Yes                   | 1.17       | 0.85491      |
| <b>Vigorous physical activity</b> | No                    |            |              |
|                                   | Yes                   | 1.34       | 0.746554     |
| <b>Yoga-related activity</b>      | No                    |            |              |
|                                   | Yes                   | 1.19       | 0.842217     |
| <b>MPCE quintile</b>              | Poorest               |            |              |
|                                   | Poorer                | 1.58       | 0.6321       |
|                                   | Middle                | 1.62       | 0.619148     |
|                                   | Richer                | 1.62       | 0.615864     |
|                                   | Richest               | 1.64       | 0.61142      |
| <b>Religion</b>                   | Hindu                 |            |              |
|                                   | Muslim                | 1.1        | 0.905111     |
|                                   | Others                | 1.11       | 0.901879     |
| <b>Caste</b>                      | SC/ST                 |            |              |
|                                   | OBC                   | 1.71       | 0.583286     |
|                                   | Others                | 1.81       | 0.552774     |
| <b>Place of residence</b>         | Urban                 |            |              |
|                                   | Rural                 | 1.33       | 0.754115     |
| <b>Region</b>                     | North                 |            |              |

|           |      |          |
|-----------|------|----------|
| Central   | 2.31 | 0.432528 |
| East      | 2.46 | 0.406006 |
| Northeast | 1.24 | 0.805888 |
| West      | 2.48 | 0.40334  |
| South     | 2.08 | 0.480153 |
| Mean VIF  |      | 1.57     |

*VIF: Variance inflation factor; MPCE: Monthly per capita consumption expenditure*
